# Supplementary material for: Calcium Plays a Double-Edged Role in Modulating Cadmium Uptake and Translocation in Rice
Source: MDPI journal article supplement (doi:10.3390/ijms21218058), 2020-10-29
Supplement: s1 [file s1]

**Table S1** Primer sequences used for qRT-PCR

| Gene name       | Forward sequence5'-3'        | Revers sequence5'-3'         |
|-----------------|------------------------------|------------------------------|
| <i>OsNRAMP1</i> | AGGAATACACCCGCATCAG          | TACATACAGTGCCGGAGACA         |
| <i>OsNRAMP5</i> | CGCTCCCAAGGTAGAGAAG<br>AAGAA | ATATAAACGAACGGCTCCGAC<br>GCA |
| <i>OsHMA2</i>   | GGACGCATCGGACAATCAT          | CATGTGCCAACATCTGCAA          |
| <i>OsHMA3</i>   | TCCATCCAACCAAACCCGG<br>AAA   | TGCCAATGTCCTTCTGTTC<br>A     |
| <i>OsActin</i>  | GCATCTCTCAGCACATTCCA         | GCGATAACAGCTCCTCTTGG         |
